# Supplementary material for: Addressing Chemotherapy-Induced Peripheral Neuropathy Using Multi-Frequency Vibrometry and Patient-Reported Outcomes
Source: MDPI journal article supplement (doi:10.3390/jcm11071862), 2022-03-27
Supplement: s1 [file s1]

Supplementary Table S1: Treatment characteristics

| Courses and dose                           | N       | Mean | Range    | S.E |
|--------------------------------------------|---------|------|----------|-----|
| Oxaliplatin                                | 16      |      |          |     |
| - Number of courses given                  | 59      | 4    | 1-8      |     |
| - Cumulative dose (mg/m <sup>2</sup> )     |         | 436  | 129-1023 | 54  |
| Paclitaxel                                 | 15      |      |          |     |
| - Number of courses given                  | 60      | 4    | 1-8*     |     |
| - Cumulative dose (mg/m <sup>2</sup> )     |         | 618  | 172-1063 | 69  |
| Dose delay and discontinuation             | N       |      |          | %   |
| Dose delays                                | 14 / 31 |      |          | 45  |
| Main reason:                               |         |      |          |     |
| - Neutropenia                              | 6       |      |          |     |
| - Thrombocytopenia                         | 3       |      |          |     |
| - CIPN                                     | 1       |      |          |     |
| - CINV                                     | 1       |      |          |     |
| - Fatigue                                  | 1       |      |          |     |
| - Unrelated to CT                          | 2       |      |          |     |
| Dose reduction                             | 16 / 31 |      |          | 52  |
| Main reason:                               |         |      |          |     |
| - CIPN                                     | 13      |      |          |     |
| - CINV                                     | 2       |      |          |     |
| - Thrombocytopenia                         | 1       |      |          |     |
| Discontinuation of neurotoxic chemotherapy | 21 / 31 |      |          | 68  |
| Main Reason:                               |         |      |          |     |
| - CIPN                                     | 10      |      |          |     |
| - Taxol Reaction                           | 4       |      |          |     |
| - Relapse                                  | 2       |      |          |     |
| - Other reasons                            | 5       |      |          |     |

\* One patient relapsed and was reinduced with Carbo-Tax before end-of-study

Supplementary Figure S1

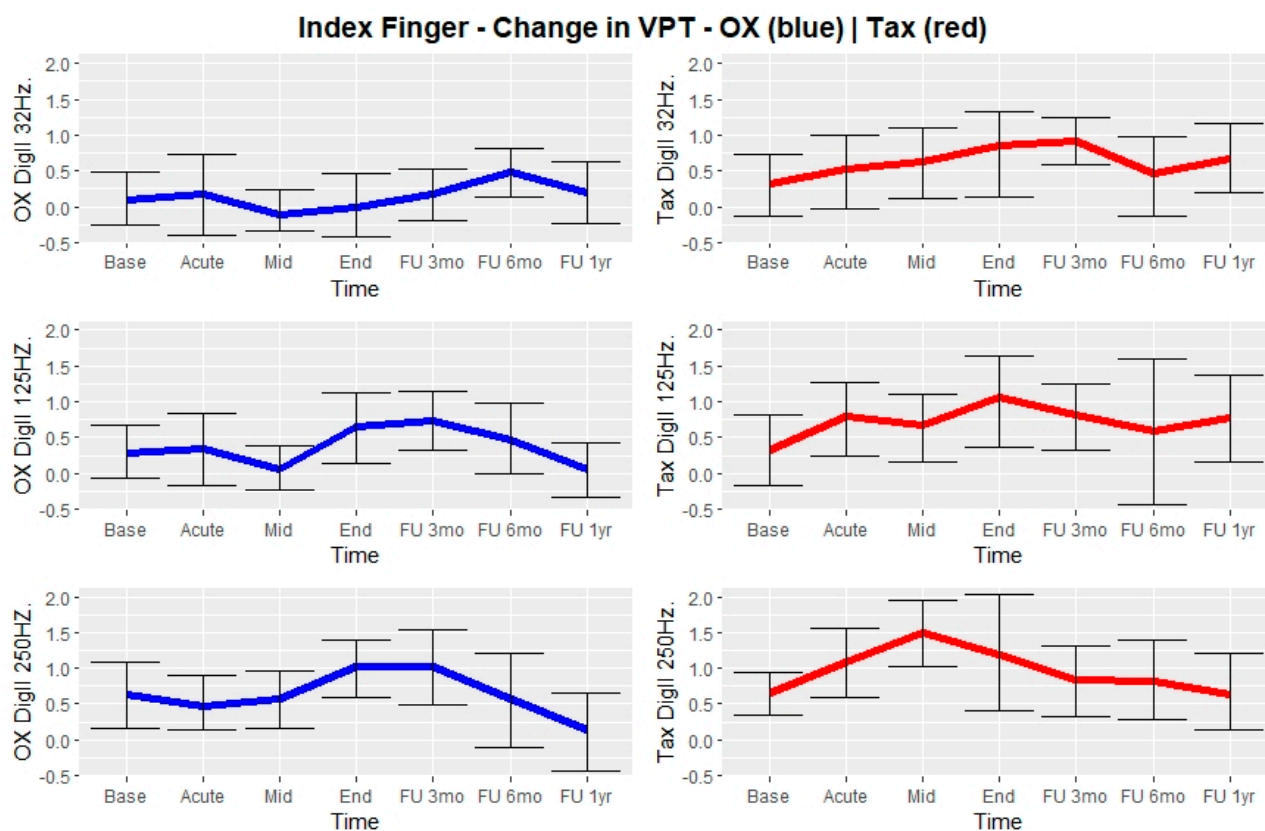

**Suppl.Fig S1** Development of mean VPT Z-scores taken from patient' dominant index finger from baseline to 1-year after end-of-treatment including the acute measurement taken once between day 3-5 in the 1. Course of chemotherapy. Errorbars represent 95% Confidence intervals of mean VPT Z-scores. Left-Blue: Depicts patients in CAPOX treatment. Right-Red: Depicts patients in Carbo-Tax treatment.

Supplementary Figure S2

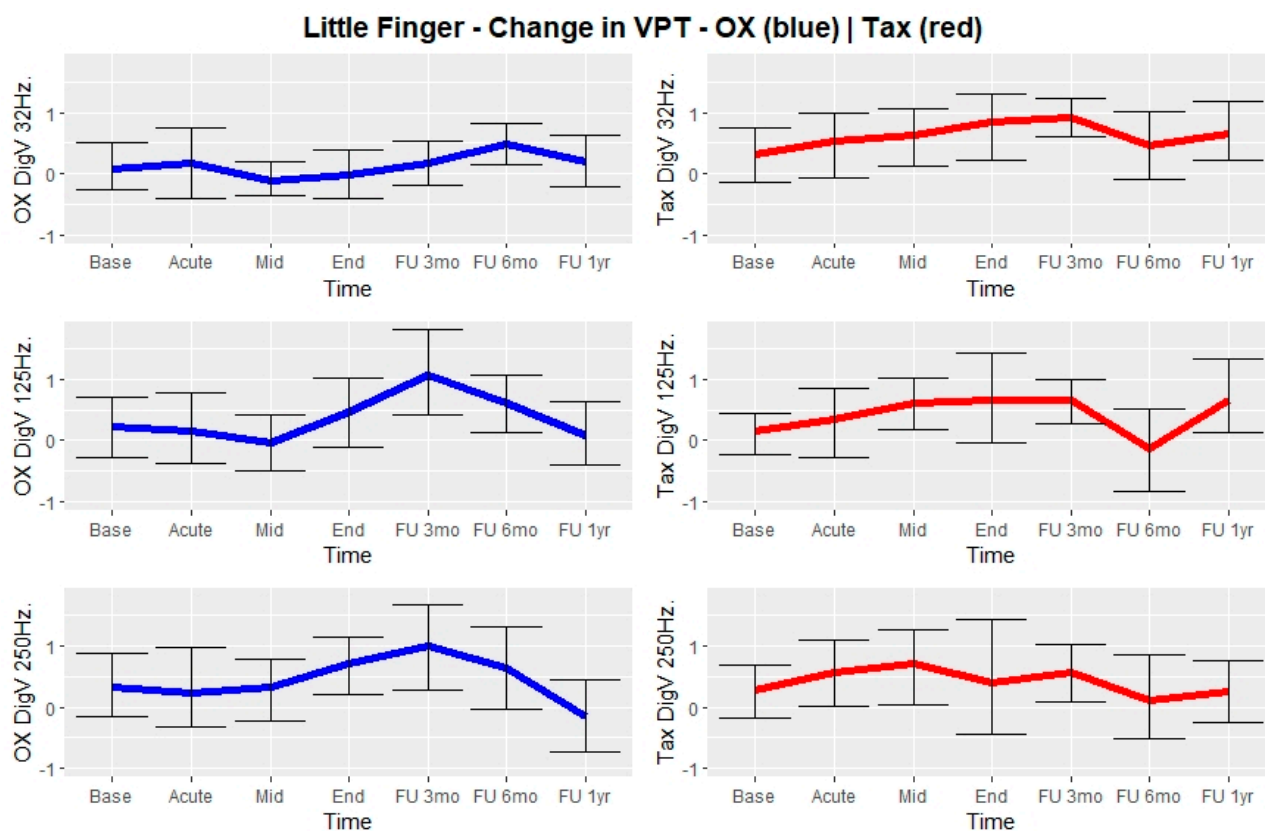

**Suppl.Fig S2** Development of mean VPT Z-scores taken from patient' dominant little finger from baseline to 1-year after end-of-treatment including the acute measurement taken once between day 3-5 in the 1. Course of chemotherapy. Errorbars represent 95% Confidence intervals of mean VPT Z-scores. Left-Blue: Depicts patients in CAPOX treatment. Right-Red: Depicts patients in Carbo-Tax treatment.

Supplementary Figure S3

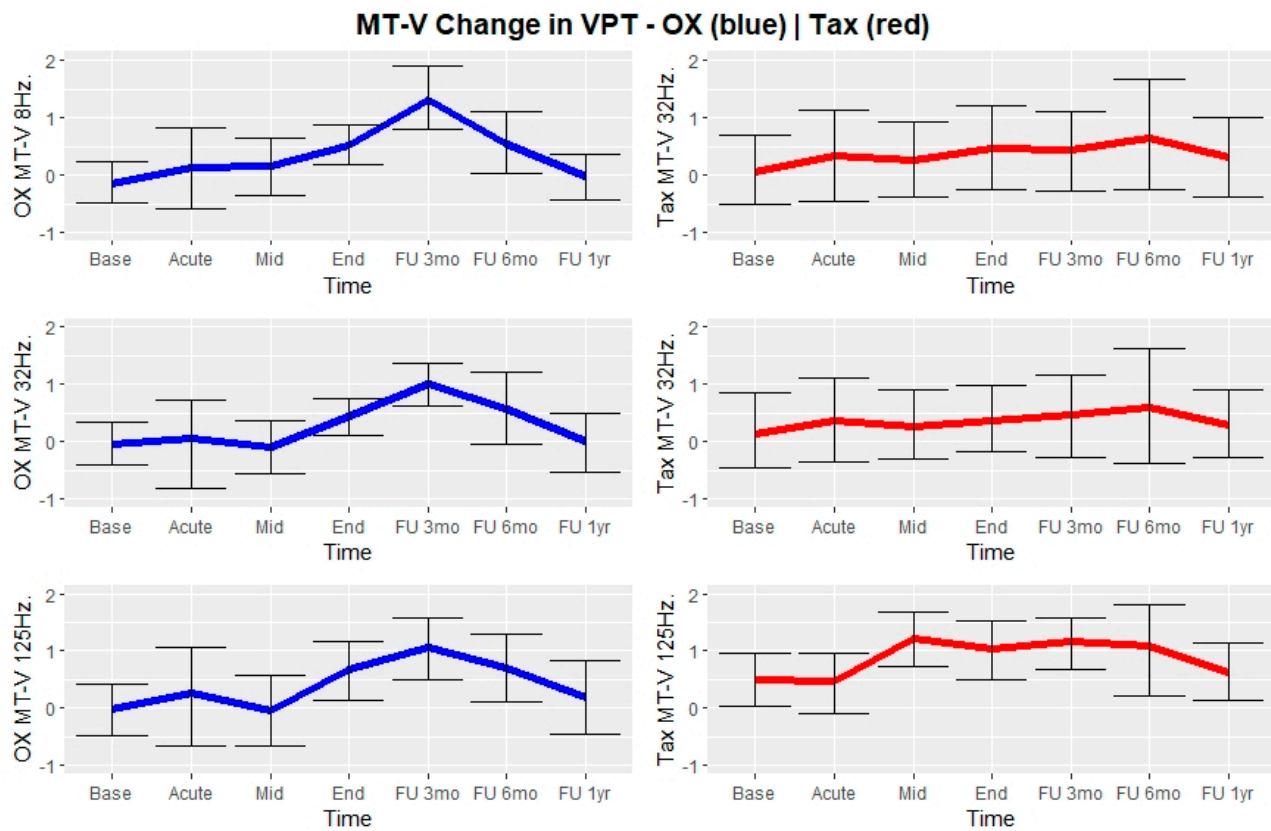

**Suppl. Fig S3** Development of mean VPT Z-scores taken from patient' dominant metatarsal V (palmar surface) from baseline to 1-year after end-of-treatment including the acute measurement taken once between day 3-5 in the 1. Course of chemotherapy. Errorbars represent 95% Confidence intervals of mean VPT Z-scores. Left-Blue: Depicts patients in CAPOX treatment. Right-Red: Depicts patients in Carbo-Tax treatment.
